# Supplementary material for: Hands-On Experience of Crowdsourcing for Flood Risks. An Android Mobile Application Tested in Frederikssund, Denmark
Source: Int J Environ Res Public Health. 2018 Sep 4;15(9):1926. doi: 10.3390/ijerph15091926 (PMC6164660; doi:10.3390/ijerph15091926)
Supplement: Supplementary file 1 [file ijerph-15-01926-s001.xlsx]

## Sheet: Exposed Elements - MC test
Record Number	Login Email Address	Address	Number of Residents	Age Range Min	Age Range Max	Limited Mobility	Elderly People
1	[records removed for privacy related reasons]	[records removed for privacy related reasons]	0			0	0
2			1	15-60	>60	1	1
3			2	>60	>60	0	0
4			6	<15	>55	1	0
5			1	<15	>60	1	1
6			23	<15	15-60	0	0
7			4	<15	15-60	0	0
8			2	<15	>60	1	1
9			23	<15	15-60	1	0
10			7	15-60	>60	2	2
11			23	<15	>60	0	0
12			16	<15	>60	2	3
13			5	<15	>60	5	5
14			5	<15	15-60	2	1
15			4	15-60	15-60	0	0

## Sheet: Flood Equipment - MC Test
N.	Login Email Address	Flood Equipment
1	[records removed for privacy related reasons]	Hags. Medicines. Safety guide
2		None
3		None
4		None
5		3-day supply of easy-to-prepare food per person. Battery-powered radio and extra-battery (keep staff within reach and note local radio frequencies). Flashlight. Electric generator (test regularly and when flooding is imminent. Test away from windows, doors, rooms or crawlspace or enclosed area). Rain gear. Emergency blankets
6		Basic Medical Staff & Items. Common medicines + 7 days supply for chronics treatments. First Aid Kit. Hygiene. Emergency Baby Pantry (Food , Milk, Diapers). Insect Repellent and water purification tablets. Water: calculate 1.5 liter per person per day in warm weather
7		None
8		First Aid Kit. Personal Hygiene & Sanitation Items
9		None
10		None
11		Basic Medical Staff & Items. Medication (7 Day Supply). First Aid Kit. 3-day supply of easy-to-prepare food per person
12		None
13		None
14		None
15		None
16		None
17		None
18		First Aid Kit. Rain gear
19		None
20		3-day supply as minimum. One gallon per person per day. Fill bottles before the event. 3-day supply of easy-to-prepare food per person
21		None
22		None
23		Basic Medical Staff & Items. Medication (7 Day Supply). First Aid Kit. Insect Repellent
24		None
25		None

## Sheet: Awareness - MC Test
Record Number	Login Email Address	Awareness
1	[records removed for privacy related reasons]	Check your preparedness kit for possible flood warnings. Bring first aim needs (food, water, warm dress and first aid kit at higher ground). Prepare a safety area. Prepare a detailed evacuation plan for animal in case of farm or large numbers. Control your insurance details, concerning your building/property in case of flooding. Check with public authority if your building/property is included in…
2		Check the preparedness meausures for possible flood warnings. Prepare several plastic bottles with drinking water. During an emergency, water may not be available or contaminated. Prepare bottles and fit sinks with water to quickly clean/remove any stuff from floors and within toilettes. Be ready to move to higher ground and bring your emergency kit along. Stay connected with local radio, TV and …
3		Prepare several plastic bottles with drinking water. During an emergency, water may not be available or contaminated
4
5
6
7
8
9
10
11		Check your preparedness kit for possible flood warnings. Prepare one car with a full tank. Gas stations may be closed during emergencies, unstable, old or dangerous equipment (furniture, tools, instruments) has to be positioned in a safe location or outside building to avoid evacuation action.
12
13
14		Check your preparedness kit for possible flood warnings. Prepare several plastic bottles with drinking water. During an emergency, water may not be available or contaminated. Prepare bottles and fit sinks with water to quickly clean/remove any stuff from floors and within toilettes. Be ready to move to higher ground and bring your emergency kit. Stay connected with local radio, TV and maintain a …
15
16
17
18
19		Prepare bottles and fit sinks with water to quickly clean/remove any stuff from floors and within toilettes. Prepare one car with a full tank. Gas stations may be closed during emergencies. Bring first aim needs (food, water, warm dress and first aid kit at higher ground). Prepare a safety area.
20
21
22		Prepare several plastic bottles with drinking water. During an emergency, water may not be available or contaminated. Prepare bottles and fit sinks with water to quickly clean/remove any stuff from floors and within toilettes. Be ready to move to higher ground and bring your emergency kit. Stay connected with local radio, TV and maintain a charge and connection on your mobile devices. Before any …
23
24
25

## Sheet: Insurance - MC
Record Number	Login Email Address	Insurance Cover
1	[records removed for privacy-related reasons]	Flood Damage, Insurance Company. Insurance Claim
2
3		Take a photo to test your damages
4
5		Take a photo to test your damages. Mark level of water for single room. List your goods and stuff damaged (check your policy cover). Save copies for every documents shared with insurance company (letters, emails).
6
7
8		Take a photo to test your damages. Mark level of water for single room. List your goods and stuff damaged (check your policy cover).
9
10		Check the policy terms and what policy pays in case of damage. Save copies of every document shared with insurance company (letters, emails)
11
12
13
14		Take a photo to test your damages. Mark level of water for single room. List your goods and stuff damaged (check your policy cover). Check the policy terms and what policy pays in case of damage. Save copies of every document shared with insurance company (letters, emails)
15
16
17
18
19
20		Save copies for every document shared with insurance company (letters, emails)
21
22
23		Take a photo to test your damages. Mark level of water for single room. List your goods and stuff damaged (check your policy cover). Check the policy terms and what policy pays in case of damage. Save copies of every document shared with insurance company (letters, emails). Conserve damaged stuff and goods.
24
25

## Sheet: Damages - MV
Record Number	Login Email Address	Type of View	Type of Damage	People Involved
1	[records removed for privacy-related reasons]	Inside	Gas/Electricity supplies	2
2		Inside	Gas/Electricity supplies	2
3		Inside	Gas/Electricity supplies	2
4		Inside	Gas/Electricity supplies	2
5		Inside	Gas/Electricity supplies	2
6		Inside	Gas/Electricity supplies	2
7		Inside	Gas/Electricity supplies	2
8		Inside	Gas/Electricity supplies	2
9		Inside	Gas/Electricity supplies	2
10		Inside	Gas/Electricity supplies	2
11		Outside	Wastewater	2
12		Outside	Wastewater	2
13		Outside	Fire	5
14		Outside	Gas/Electricity supplies	5
15		Inside	Fire	3
16		Inside	Flooded Cellar	4
17		Inside	Other	4
18		Outside	Gas/Electricity supplies	2
19		Inside	Other	4
20		Inside	Gas/Electricity supplies	2
21		Inside	Other	2
22		Outside	Other	0
23		Inside	Flooded Cellar	5
24		Inside	Other	4
25		Inside	Other	0
26		Inside	Flooded Cellar	3
27		Inside	Other	0
28		Inside	Gas/Electricity supplies	3
29		Inside	Gas/Electricity supplies	2
30		Inside	Gas/Electricity supplies	2
31		Inside	Flooded Cellar	1
32		Inside	Flooded Cellar	3
33		Inside	Flooded Cellar	3
34		Inside	Flooded Cellar	2
35		Outside	Gas/Electricity supplies	1
36		Inside	Flooded Cellar	2
37		Inside	Flooded Cellar	2
38		Inside	Flooded Cellar	2
39		Inside	Flooded Cellar	2
40		Inside	Flooded Cellar	2
41		Outside	Gas/Electricity supplies	1
42		Inside	Flooded Cellar	2
43		Inside	Flooded Cellar	2
44		Inside	Flooded Cellar	2
45		Inside	Gas/Electricity supplies	2
46		Inside	Flooded Cellar	1
47		Inside	Other	4
48		Inside	Gas/Electricity supplies	3
49		Outside	Infrastructural damage	4
50		Outside	Pipeline	2
51		Inside	Other	1
52		Outside	Other	2
53		Inside	Flooded Cellar	1
54		Inside	Gas/Electricity supplies	2
55		Inside	Gas/Electricity supplies	0
56		Outside	Gas/Electricity supplies	1
57		Outside	Flooded Road	0
58		Outside	Landslide	0
59		Outside	Flooded Road	3
60		Inside	Flooded Cellar	1
61		Inside	Flooded Cellar	1
62		Inside	Gas/Electricity supplies	2
63		Inside	Flooded Cellar	1
64		Inside	Flooded Cellar	1
65		Inside	Flooded Cellar	1
66		Outside	Gas/Electricity supplies	0
67		Outside	Other	0
68		Inside	Flooded Cellar	1
69		Inside	Other	1
70		Outside	Other	3
71		Inside	Flooded Cellar	2

## Sheet: Danger - MV
Record Number	Login Email Address	Danger Status	Danger Visibility
1	[records removed for privacy-related reasons]	near	visible
2		ongoing	visible
3		near	visible
4		ongoing	not visible
5		near	visible
6		near	visible
7		near	visible
8		near	visible
9		near	visible
10		near	visible
11		near	not visible
12		near	visible
13		near	visible
14		near	visible
15		near	visible
16		near	visible
17		near	visible
18		ongoing	visible
19		near	visible
20		ongoing	not visible
21		near	visible
22		near	visible
23		near	visible
24		near	visible
25		near	visible
26		ongoing	visible
27		near	not visible
28		near	visible
29		near	visible
30		ongoing	visible
31		near	visible
32		ongoing	visible
33		near	visible
34		near	visible
35		ongoing	visible
36		near	visible
37		ongoing	not visible
38		ongoing	visible
39		near	visible
40		near	visible
41		near	visible
42		near	visible
43		near	visible
44		ongoing	not visible
45		near	not visible
46		near	visible
47		near	visible
48		near	visible
49		ongoing	visible
50		near	visible
51		ongoing	not visible
52		ongoing	not visible
53		near	visible
54		ongoing	not visible
55		ongoing	not visible
56		near	not visible
57		near	not visible
58		near	not visible
59		near	visible
60		ongoing	not visible
61		ongoing	not visible
62		near	not visible
63		ongoing	not visible
64		near	not visible
65		near	visible
66		ongoing	not visible
67		near	visible
68		near	not visible
69		near	visible
70		near	visible
71		ongoing	visible
72		near	visible
73		near	visible
74		near	visible
75		ongoing	not visible
76		near	visible
77		near	visible
78		near	visible
79		ongoing	not visible
80		near	visible
81		near	visible
82		ongoing	visible
83		ongoing	not visible
84		ongoing	visible
85		ongoing	visible
86		ongoing	visible
87		ongoing	not visible
88		near	visible
89		near	visible
90		near	visible
91		near	visible
92		near	visible
93		near	visible
94		near	visible
95		near	visible
96		near	visible
97		near	visible
98		near	visible
99		near	visible
100		near	visible
101		near	visible
102		near	visible
103		near	visible
104		ongoing	visible
105		ongoing	not visible
106		ongoing	not visible
107		ongoing	visible
108		near	visible
109		ongoing	visible
110		near	visible
111		near	visible
112		near	visible
113		ongoing	visible

## Sheet: Hazard - MV
Record Number	Login Email Address	Typology	Hazard Sources	Accident Type	Material State	Material Typology	Spill State	Oil Level (liters)	Explosion Type
1	[records removed for privacy-related reasons]	Unknown	Oil	Unknown	Liquid	Unknown	Potential risk of spilling	Unknown
2		Traffic Accident	Flammable materials	Collision	Solid	Toxic
3		Oil Spill	Oil	Leakage	Liquid	Toxic	Ongoing spilling	>200
4		Oil Spill	Oil	Leakage	Liquid	Toxic	Ongoing spilling	50-200
5		Fire	Industrial process	Explosion	Gas	Toxic			Class 1.5
6		Traffic Accident	Oil	Collision	Liquid	Toxic	Ongoing spilling	<50
7		Oil Spill	Oil	Leakage	Liquid	Toxic	Ongoing spilling	>200
8		Fire	Gas Fired	Leakage	Gas	Toxic
9		Fire	Industrial process	Unknown	Gas	Toxic
10		Fire	Gas Fired	Explosion	Gas	Unknown			Class 1.3
11		Unknown	Storage facility	Leakage	Unknown	Unknown	Potential risk of spilling
12		Fire	Unknown	Explosion	Gas	Unknown			Unknown
13		Traffic Accident	Flammable materials	Collision	Liquid	Unknown	Ongoing spilling
14		Infrastructural collapse	Unknown	Collision	Solid	Unknown
15		Fire	Storage Facility	Explosion	Gas	Unknown			Class 1.1
16		Fire	Unknown	Explosion	Gas	Toxic			Unknown
17		Traffic Accident	Flammable materials	Leakage	Liquid	Unknown	Ongoing spilling	<50
18		Unknown	Industrial process	Leakage	Unknown	Unknown
19		Traffic Accident	Oil	Collision	Liquid	Unknown	Ongoing spilling	<50
20		Fire	Industrial process	Leakage	Gas	Unknown
21		Fire	Unknown	Explosion	Gas	Unknown			Unknown
22		Traffic Accident	Oil	Collision	Liquid	Unknown	Potential risk of spilling	Unknown
23		Fire	Gas Fired	Explosion	Gas	Unknown			Class 1.1
24		Fire	Unknown	Unknown	Unknown	Unknown
25		Hazardous Material	Industrial process	Leakage	Unknown	Toxic	Ongoing spilling
26		Hazardous Material	Industrial process	Unknown	Gas	Toxic
27		Fire	Unknown	Unknown	Gas	Unknown
28		Fire	Unknown	Explosion	Gas	Toxic			Unknown
29		Fire	Unknown	Leakage	Gas	Unknown
30		Oil Spill	Oil	Leakage	Liquid	Unknown	Ongoing spilling	50-200
31		Fire	Storage facility	Explosion	Gas	Unknown			Class 1.5
32		Traffic Accident	Oil	Collision	Liquid	Unknown	Ongoing spilling	<50
33		Traffic Accident	Flammable materials	Collision	Liquid	Unknown	Potential risk of spilling	Unknown
34		Traffic Accident	Flammable materials	Collision	Gas	Unknown
35		Traffic Accident	Flammable materials	Collision	Liquid	Toxic	Ongoing spilling	50-200
36		Oil Spill	Oil	Leakage	Liquid	Toxic	Ongoing spilling	>200
37		Oil Spill	Oil	Leakage	Liquid	Toxic	Ongoing spilling	Unknown
38		Other	Unknown	Unknown	Unknown	Unknown
39		Infrastructural collapse	Terrorism	Unknown	Solid	Non-Toxic
40		Traffic Accident	Unknown	Collision	Solid	Non-Toxic
41		Traffic Accident	Oil	Collision	Liquid	Unknown	Ongoing spilling	<50
42		Infrastructural collapse	Unknown	Unknown	Solid	Non-Toxic
43		Hazardous Material	Industrial process	Explosion	Solid	Unknown			Class 1.6
44		Infrastructural collapse	Terrorism	Explosion	Solid	Unknown			Class 1.5
45		Traffic Accident	Oil	Leakage	Liquid	Unknown	Ongoing spilling	<50
46		Fire	Storage facility	Explosion	Gas	Toxic			Class 1.1
47		Traffic Accident	Oil	Collision	Liquid	Unknown	Ongoing spilling	50-200
48		Fire	Unknown	Unknown	Gas	Unknown
49		Traffic Accident	Flammable materials	Collision	Solid	Unknown	Potential risk of spilling
50		Unknown	Gas Fired	Explosion	Gas	Unknown			Unknown
51		Infrastructural collapse	Unknown	Unknown	Solid	Non-Toxic
52		Fire	Gas fired	Explosion	Gas	Toxic			Class 1.5
53		Hazardous Material	Unknown	Unknown	Solid	Unknown
54		Traffic Accident	Unknown	Collision	Unknown	Unknown
55		Fire	Unknown	Unknown	Gas	Unknown
56		Fire	Gas Fired	Explosion	Gas	Toxic			Class 1.3
57		Fire	Unknown	Explosion	Gas	Unknown			Class 1.6
58		Fire	Gas fired	Explosion	Gas	Toxic			Class 1.5
59		Gas Leak	Gas Fired	Leakage	Gas	Toxic
60		Unknown	Gas Fired	Unknown	Gas	Unknown
61		Hazardous Material	Industrial process	Unknown	Unknown	Unknown
62		Traffic Accident	Oil	Collision	Liquid	Toxic	Ongoing spilling	50-200 liters
63		Traffic Accident	Flammable materials	Collision	Liquid	Toxic	Ongoing spilling	50-200 liters
64		Traffic Accident	Flammable materials	Collision	Liquid	Toxic	Ongoing spilling	50-200 liters
65		Flood	Water Level	Unknown	Liquid	Non-Toxic
66		Flood	Water Level	Unknown	Liquid	Non-Toxic
67		Infrastructural collapse	Unknown	Collision	Solid	Non-Toxic
68		Seismic Event	Unknown	Collapse	Solid	Non-Toxic
69		Seismic Event	Unknown	Collapse	Solid	Non-Toxic
70		Fire	Industrial process	Leakage	Liquid	Unknown	Ongoing spilling	Unknown
71		Hazardous Material	Unknown	Leakage	Unknown	Unknown	Potential risk of spilling
72		Traffic Accident	Oil	Collision	Liquid	Unknown	Ongoing spilling	50-200
73		Traffic Accident	Oil	Collision	Liquid	Unknown	Ongoing spilling	50-200
74		Oil Spill	Oil	Leakage	Liquid	Toxic	Ongoing spilling	>200
75		Fire	Industrial process	Explosion	Gas	Toxic			Unknown
76		Hazardous Material	Industrial process	Unknown	Gas	Toxic
78		Traffic Accident	Oil	Collision	Liquid	Unknown	Ongoing spilling	Unknown
79		Traffic Accident	Oil	Collision	Liquid	Unknown	Ongoing spilling	<50
80		Unknown	Gas fired	Explosion	Gas	Unknown			Class 1.6
81		Traffic Accident	Flammable materials	Collision	Liquid	Unknown	Ongoing spilling	<50
82		Hazardous Material	Unknown	Unknown	Unknown	Unknown
83		Infastructural collapse	Unknown	Collapse	Solid	Non-Toxic
84		Infastructural collapse	Unknown	Collapse	Solid	Non-Toxic
85		Infastructural collapse	Unknown	Collapse	Solid	Non-Toxic
86		Fire	Unknown	Explosion	Gas	Toxic			Class 1.3
87		Traffic Accident	Oil	Collision	Liquid	Unknown	Ongoing spilling	<50
88		Unknown	Terrorism	Collapse	Unknown	Non-Toxic
89		Unknown	Flammable materials	Unknown	Unknown	Toxic
90		Unknown	Unknown	Collapse	Unknown	Non-Toxic
91		Unknown	Unknown	Collapse	Unknown	Non-Toxic
92		Infastructural collapse	Unknown	Collapse	Solid	Non-Toxic
93		Infastructural collapse	Unknown	Collapse	Solid	Non-Toxic
94		Unknown	Terrorism	Explosion	Unknown	Unknown			Unknown
95		Unknown	Flammable materials	Leakage	Unknown	Unknown	Ongoing spilling
96		Infrastructural collapse	Unknown	Collapse	Solid	Non-Toxic
97		Infrastructural collapse	Gas Fired	Explosion	Gas	Unknown			Class 1.6
98		Gas Leak	Gas Fired	Explosion	Gas	Toxic			Class 1.4
99		Fire	Unknown	Explosion	Gas	Unknown			Unknown
100		Unknown	Unknown	Explosion	Unknown	Unknown			Unknown

## Sheet: Facilities - MV
Record Number	Login Email Address	Typology	Number	Type Of Building	Type of Vehicle
1	[records removed for privacy-related reasons]	Building	4	Public Office
2		Building	1	Single House
3		Infrastructure	1	Bridge
4		Building	>5	Commercial Centre
5		Building	1	Single House
6		Building	>5	Apartment
7		Building	1	Single House
8		Building	1	Single House
9		Building	2	Apartment
10		Building	1	Single House
11		Vehicle	2		Car
12		Building	1	Apartment
13		Infrastructure	1	Bridge
14		Vehicle	5		Car
15		Vehicle	3		Car
16		Building	2	Public Office
17		Building	1	Warehouse
18		Building	2	Single House
19		Vehicle	>5		Car
20		Infrastructure	1	Road Tunnel
21		Building	3	Public Office
22		Building	3	Public Office
23		Vehicle	1		Bus
24		Infrastructure	1	Water Tower
25		Vehicle	1		Truck
26		Vehicle	2		Boat/Ship
27		Vehicle	5		Bus
28		Building	1	Commercial Centre
29		Building	1	Single House
30		Building	4	Single House
31		Vehicle	1		Truck
32		Vehicle	4		Car
33		Building	1	Commercial Centre
34		Infrastructure	1	Bridge
35		Building	4	Apartment
36		Building	1	Public Office
37		Building	4	Commercial Centre
38		Vehicle	2		Train
39		Building	1	Public Office
40		Building	2	Apartment
41		Infrastructure	1	Bridge
42		Building	1	Apartment
43		Building	1	Apartment
44		Building	2	Public Office
45		Vehicle	1		Car
46		Building	2	Apartment
47		Vehicle	>5		Car
48		Vehicle	>5		Car
49		Building	1	Single House
50		Infrastructure	1	Airport
51		Infrastructure	1	Bridge
52		Infrastructure	1	Airport
53		Infrastructure	1	Bridge
54		Building	2	Apartment
55		Vehicle	>5		Car
56		Building	1	School
